# Supplementary material
Source: PubMed Central journal article supplement (PMC8132289)
Supplement: NIHMS1692354-supplement-S__Fig1.pdf [file NIHMS1692354-supplement-S__Fig1.pdf]

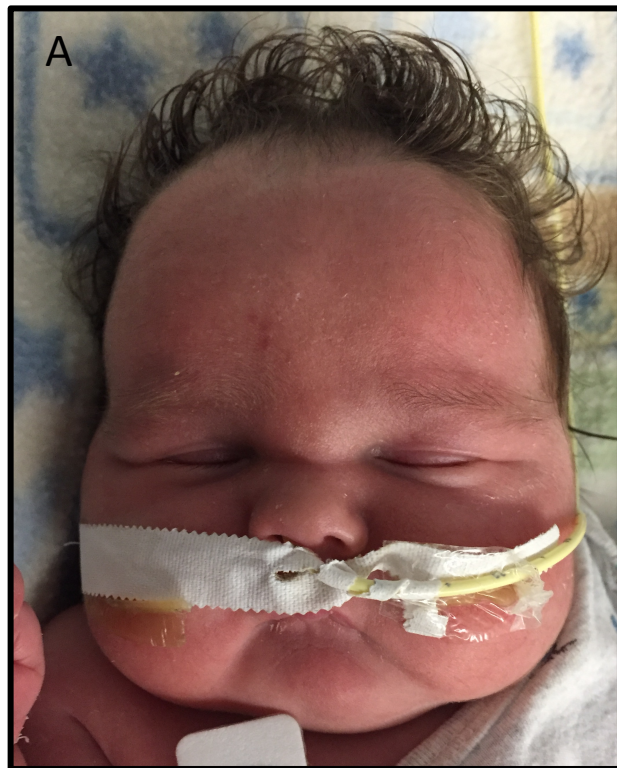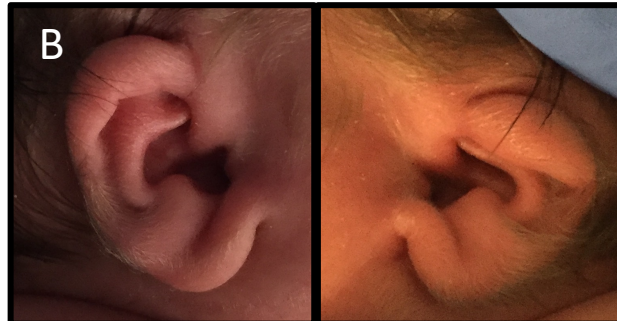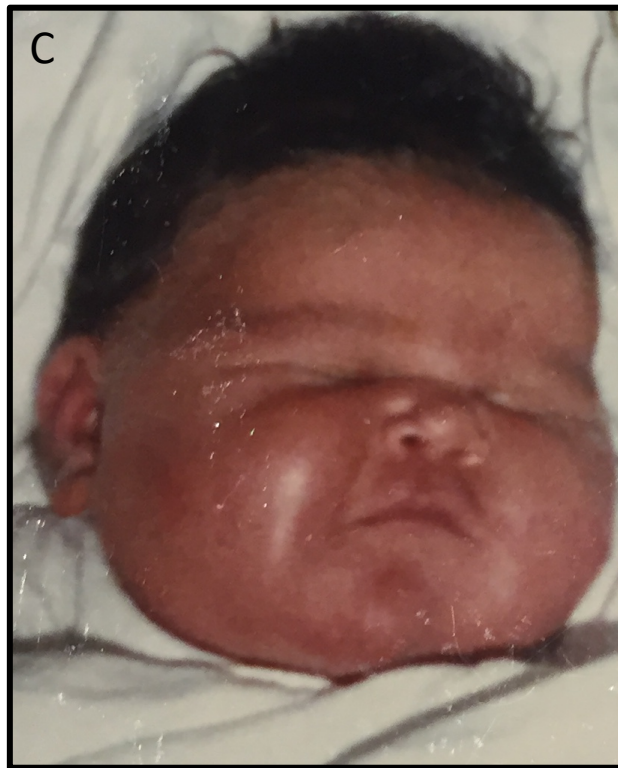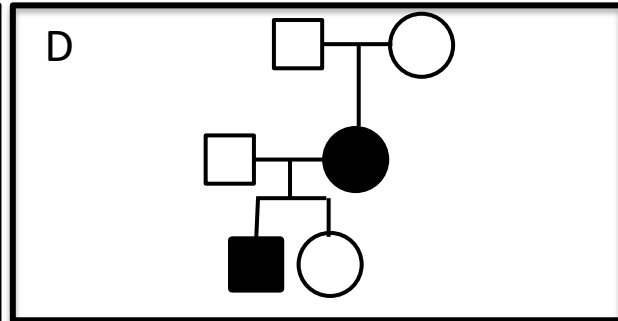

| <b>E</b><br>Features                                | <i>HNF4A</i>    | Fanconi<br>Bickel                    | Mother      | Son |
|-----------------------------------------------------|-----------------|--------------------------------------|-------------|-----|
| Macrosomia                                          | 7/14 (50%)      | -                                    | -           | -   |
| Hypoglycemic<br>hyperinsulinism                     | 18/18<br>(100%) | -                                    | +           | +   |
| Maturity Onset<br>Diabetes of the<br>Young/Diabetes | 6/10 (60%)      | -                                    | +           | N/A |
| Atypical renal<br>Fanconi<br>syndrome               | 17/17<br>(100%) | -<br>Renal<br>tubular<br>dysfunction | +           | +   |
| Hypophosphat-<br>emic Rickets                       | 8/9<br>(89%)    | +                                    | +           | -   |
| Nephrocalcinosis                                    | 8/14 (57%)      | -                                    | -           | +   |
| Hepatomegaly                                        | 6/16 (38%)      | +                                    | +           | +   |
|                                                     |                 |                                      | Liver cysts |     |
| Splenomegaly                                        | 2/11 (18%)      | +                                    | +           | -   |
| Hearing loss                                        | 2               | -                                    | -           | -   |
| Iris and<br>chorioretinal<br>coloboma               | 1               | -<br>Cataracts                       | -           | +   |
| Penile Chordee<br>and hypospadias                   | 1               | -                                    | -           | +   |
