# Supplementary material
Source: PubMed Central journal article supplement (PMC8132289)

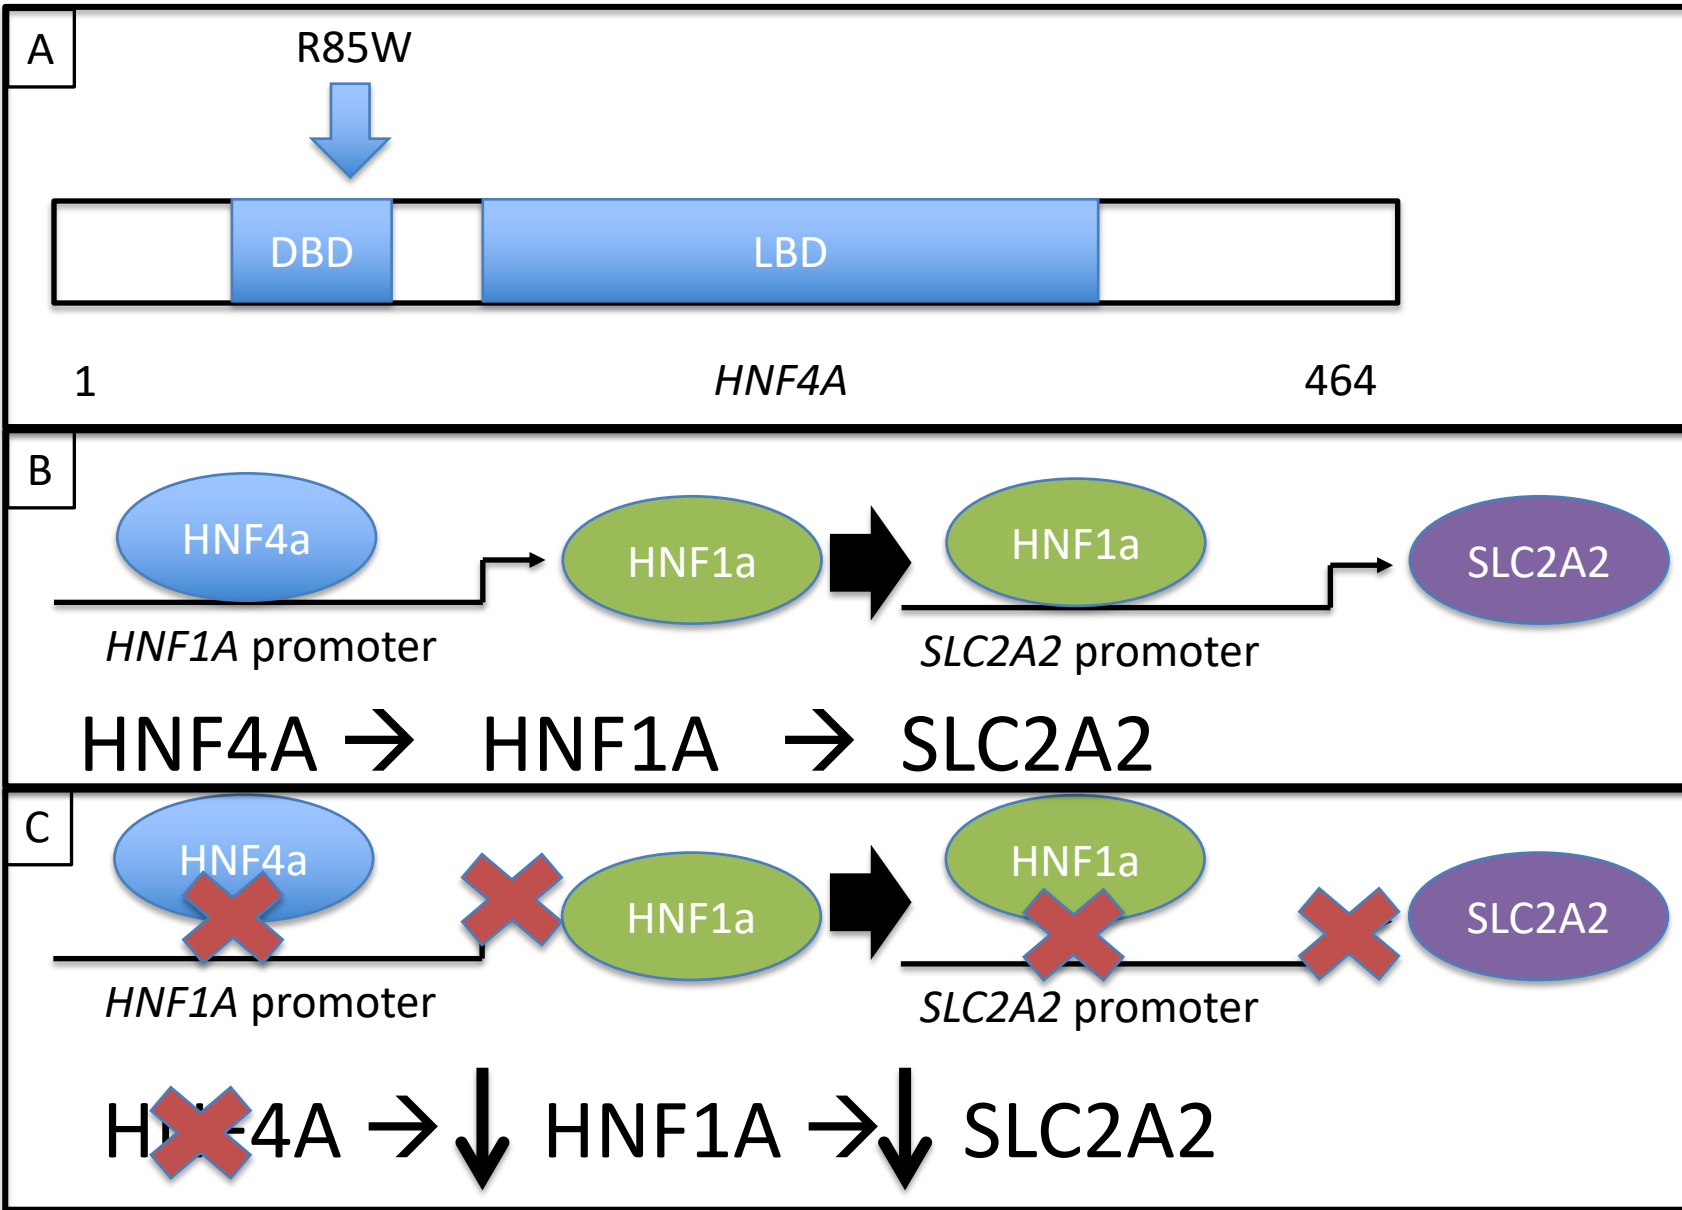

Supplement: NIHMS1692354-supplement-S__Fig2.pdf [file NIHMS1692354-supplement-S__Fig2.pdf]
